# Supplementary material for: Enhanced gene transfection ability of sulfonylated low-molecular-weight PEI and its application in anti-tumor treatment
Source: Royal Society of Chemistry journal article supplement (doi:10.1039/d4tb01760a), 2024-01-01
Supplement: d4tb01760a1.pdf [file d4tb01760a1.pdf]

## Electronic Supplementary Information (ESI)

# Enhanced gene transfection ability of sulfonylated low molecular weight PEI and its application in anti-tumor treatment

Xiao-Li Tian, Ping Chen, Yue Hu, Lan Zhang, Xiao-Qi Yu and Ji Zhang\*

*Key Laboratory of Green Chemistry and Technology (Ministry of Education), College of Chemistry, Sichuan University, Chengdu 610064, P. R. China*

\*Corresponding author: jzhang@scu.edu.cn.

**Table S1.** The composition of **Ts-P**.

| Name            | Feeding mass ratio<br>(TsCl/ PEI 1.8 kDa) | Feeding mole ratio<br>(TsCl/ amines in PEI) | Substitution<br>degree (SD) <sup>a</sup> |
|-----------------|-------------------------------------------|---------------------------------------------|------------------------------------------|
| <b>Ts-P-0.3</b> | 0.3                                       | 6.8%                                        | 6.0%                                     |
| <b>Ts-P-0.5</b> | 0.5                                       | 11.3%                                       | 10.6%                                    |
| <b>Ts-P-0.8</b> | 0.8                                       | 18.0%                                       | 18.2%                                    |
| <b>Ts-P-1.0</b> | 1.0                                       | 22.6%                                       | 22.0%                                    |

a. Substitution percentage relative to all amine groups on PEI, calculated based on <sup>1</sup>H NMR spectra.

**Table 2.** The miLogP of **R-P**.

| 编号          | miLogP |
|-------------|--------|
| <b>Bs-P</b> | 1.31   |
| <b>Ts-P</b> | 1.76   |
| <b>Fs-P</b> | 2.02   |
| <b>Ns-P</b> | 2.49   |
| <b>Bz-P</b> | 1.43   |

Calculated by Molinspiration software

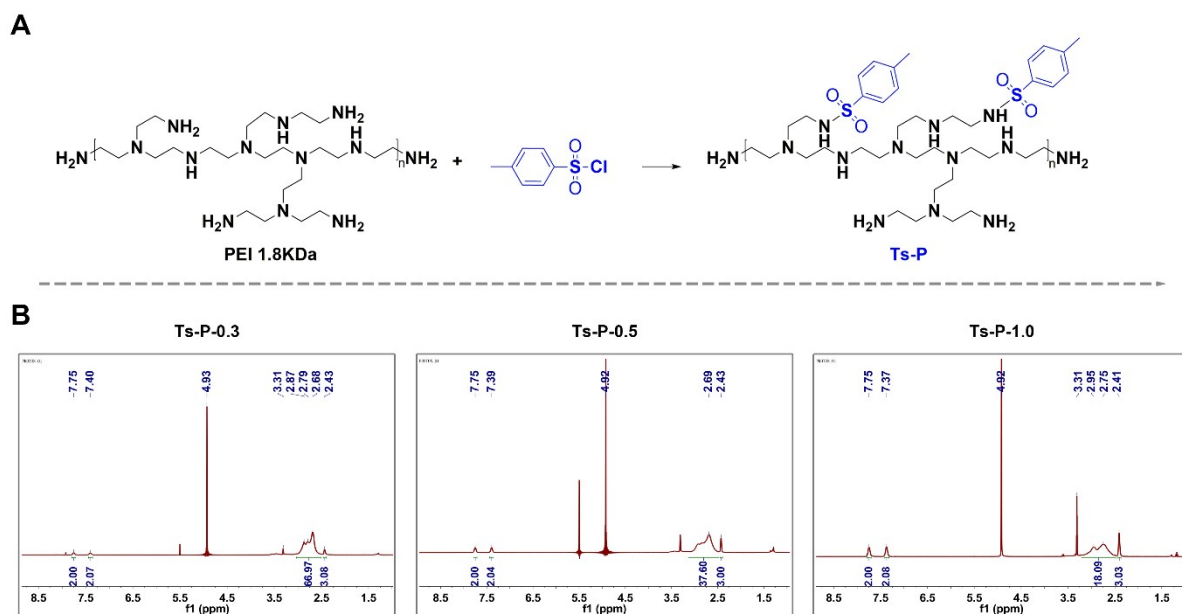

**Fig. S1.** (A) Tosylation of LMW PEI. (B)  $^1\text{H}$  NMR spectra of Ts-P-0.3, Ts-P-0.5, Ts-P-1.0.

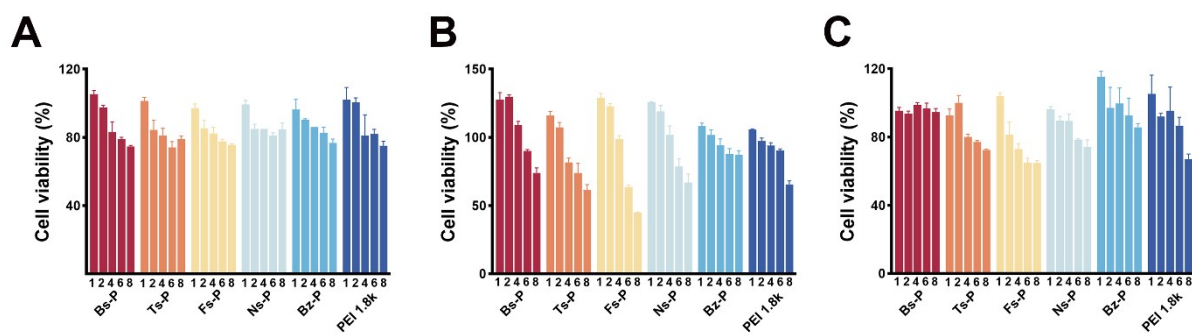

**Fig. S2.** Cell viability after treatment with polyplexes at different w/w for 24 h in B16 (A), 7702 (B) and HeLa cells (C).

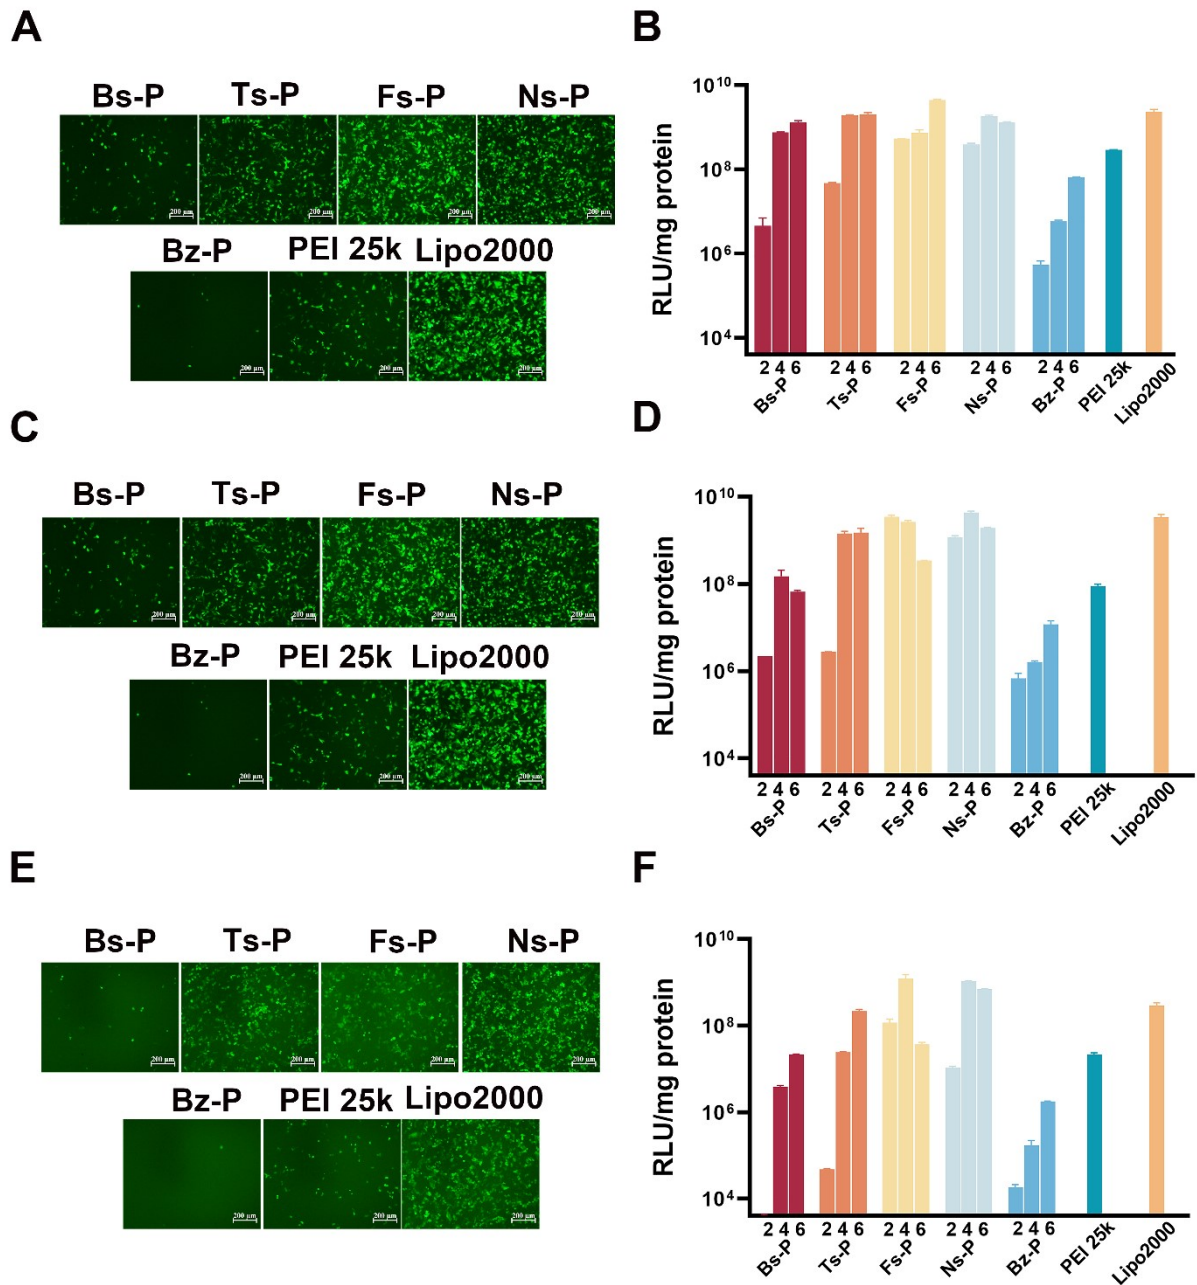

**Fig. S3.** (A & C & E) EGFP expression images after R-P/pEGFP transfection to B16 (A), 7702 (C) and HeLa cells (E), R-P/pEGFP complexes were used under the optimal w/w ratio (4 in B16 and HeLa, 2 in 7702). (B & D & F) pGL-3 expression results mediated by R-P/pGL-3 complexes in B16 (B), 7702 (D) and HeLa (F) cells. PEI 25kDa and Lipo 2000 was used as control.

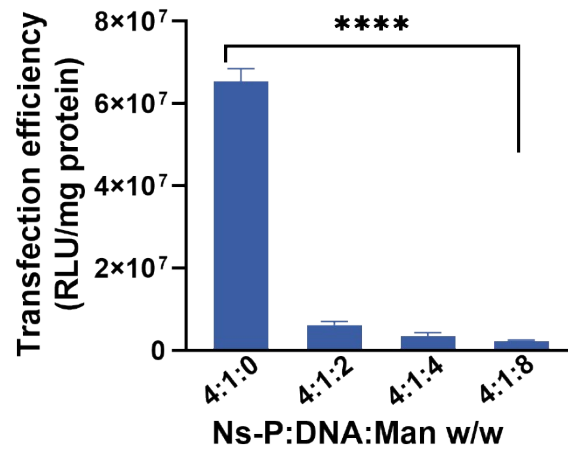

**Fig. S4.** Effect of crosslinked mannan on the transfection efficiency of Ns-P/pGL-3 polyplexes in HepG2 cells.

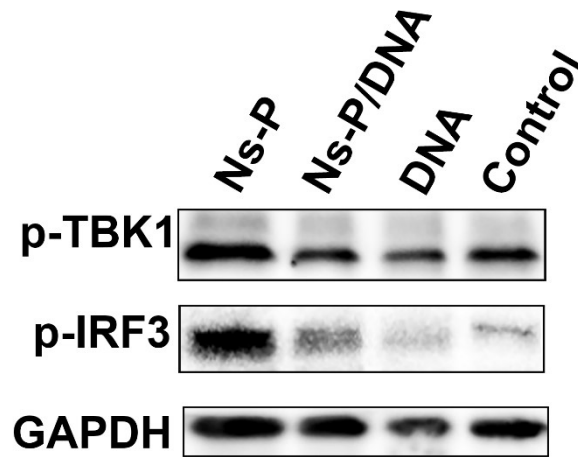

**Fig. S5.** Western blot analysis of the STING pathway activation in DC2.4 cells.

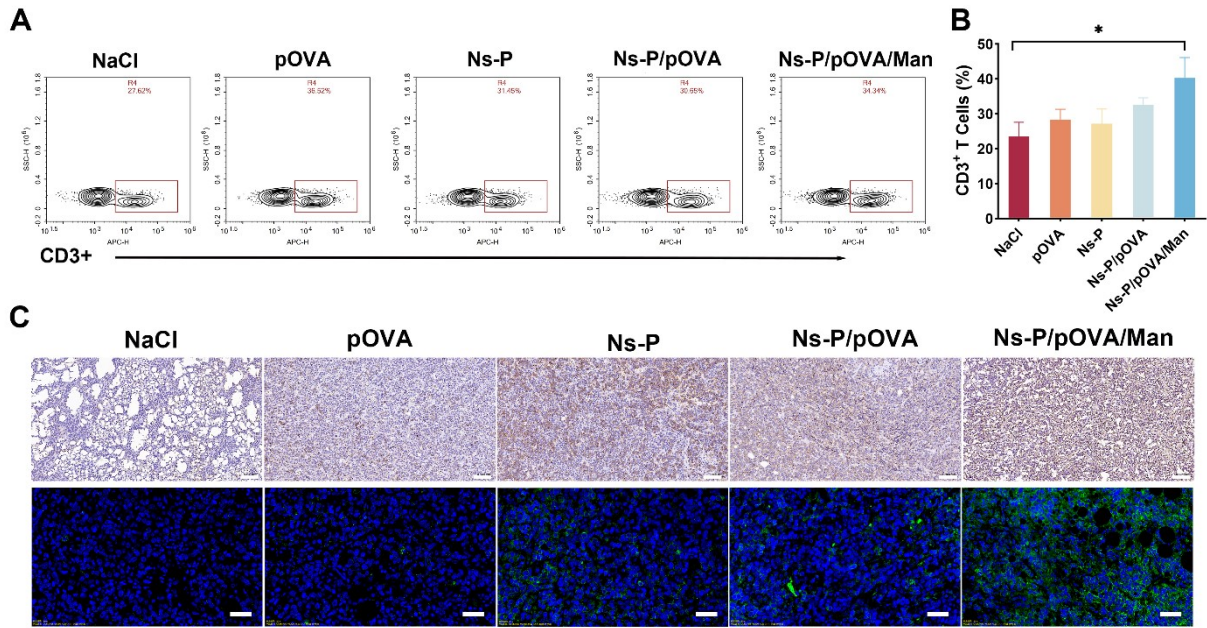

**Fig. S6.** (A & B) Flow cytometry and statistical results of the percentage of CD3<sup>+</sup> T cells in tumor. (C) Representative immunohistochemistry images of CD4<sup>+</sup> cells (brown) and the cell nuclei (purple) in tumor slices after different treatments, scale bar: 100  $\mu$ m (above); Immunofluorescence images of CD4<sup>+</sup> T cells (green) and cells nuclei (blue) in tumor slices after different treatments, scale bar: 50  $\mu$ m (below).

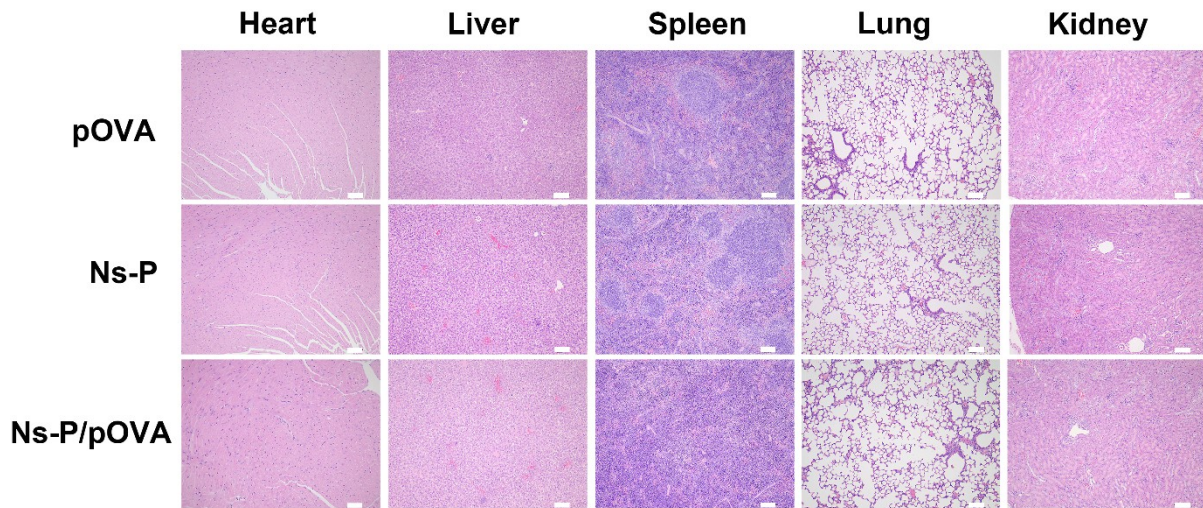

**Fig. S7.** The H & E staining results of major organs from mice after different treatments, scale bar: 100 nm.
